# Supplementary material for: Structural and vacancy assisted engineering of cobalt selenide for ultrahigh energy density sodium ion pouch cell
Source: Royal Society of Chemistry journal article supplement (doi:10.1039/d4qi01573h), 2024-01-01
Supplement: d4qi01573h1.pdf [file d4qi01573h1.pdf]

## Supporting Information

### Structural and vacancy assisted engineering of cobalt selenide for ultrahigh energy density sodium ion pouch cell

Ziling Huang<sup>a</sup>, Jing Liu<sup>a</sup>, Kang Xu,<sup>a</sup> Yue Li,<sup>a</sup> Yajun Tan,<sup>c</sup> Chencheng Sun,<sup>a\*</sup> Jun Yang,<sup>b\*</sup> Hongbo

Geng<sup>a,d\*</sup>

<sup>a</sup>School of Electronic and Information Engineering, Changshu Institute of Technology,  
Changshu 215500, China

<sup>b</sup>School of Material Science and Engineering, Jiangsu University of Science and  
Technology, Zhenjiang, 212003, China

<sup>c</sup>Phylion Battery Co, Ltd., Suzhou 215153, P. R. China

<sup>d</sup>School of Materials Engineering, Changshu Institute of Technology, Changshu,  
Jiangsu 215500, China

E-mail address: [ccsun@cslg.edu.cn](mailto:ccsun@cslg.edu.cn); [iamjyang@just.edu.cn](mailto:iamjyang@just.edu.cn); [hbgeng@gdut.edu.cn](mailto:hbgeng@gdut.edu.cn)

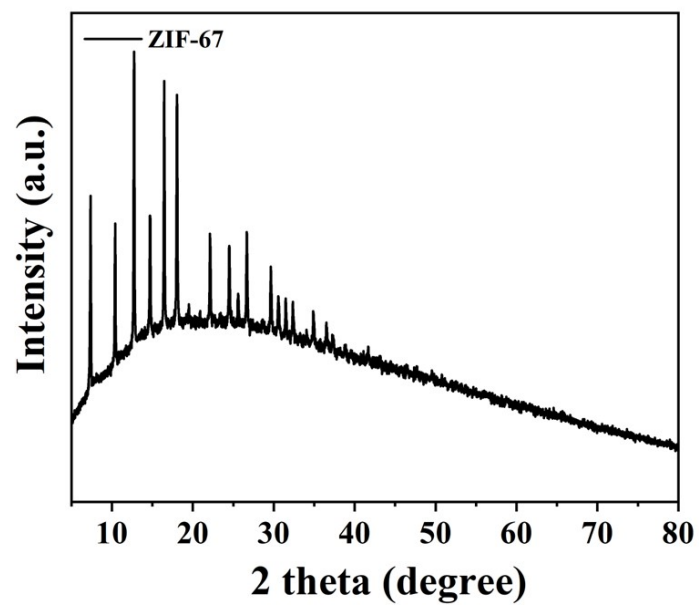

Fig S1. XRD pattern of ZIF-67.

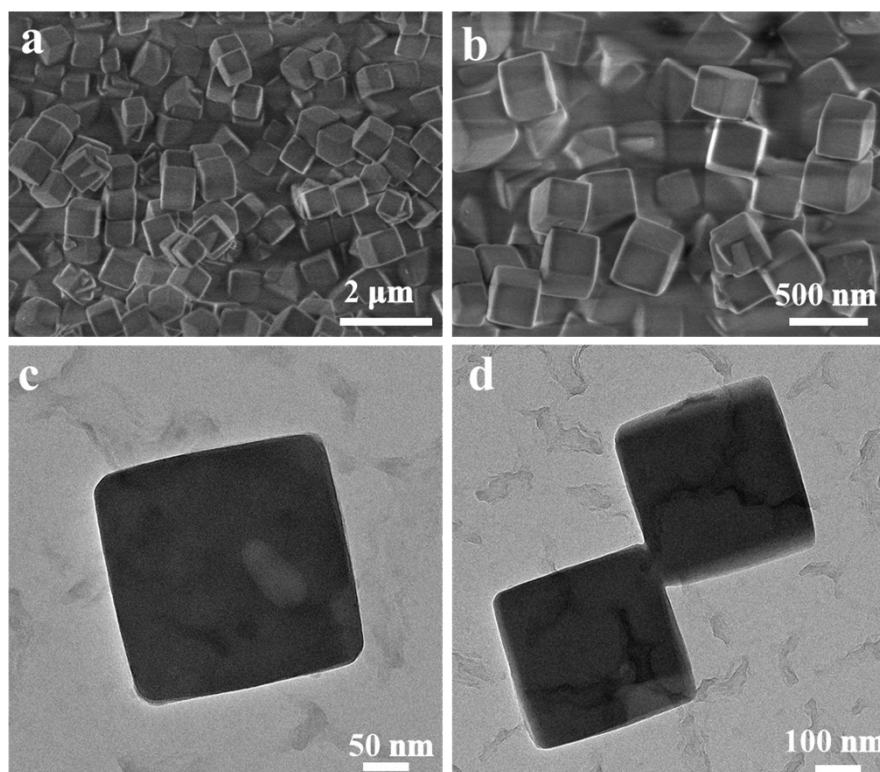

Fig S2. (a, b) SEM images and (c, d) TEM images of ZIF-67.

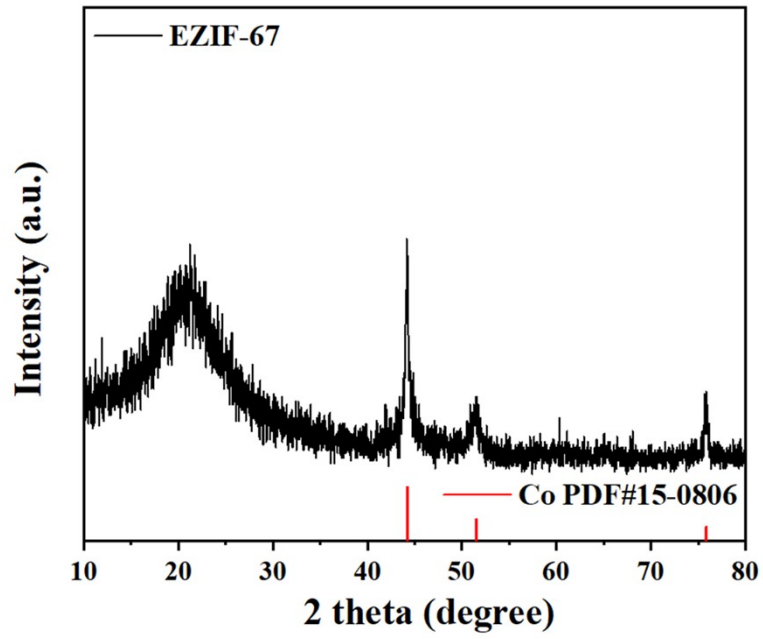

Fig S3. XRD pattern of EZIF-67.

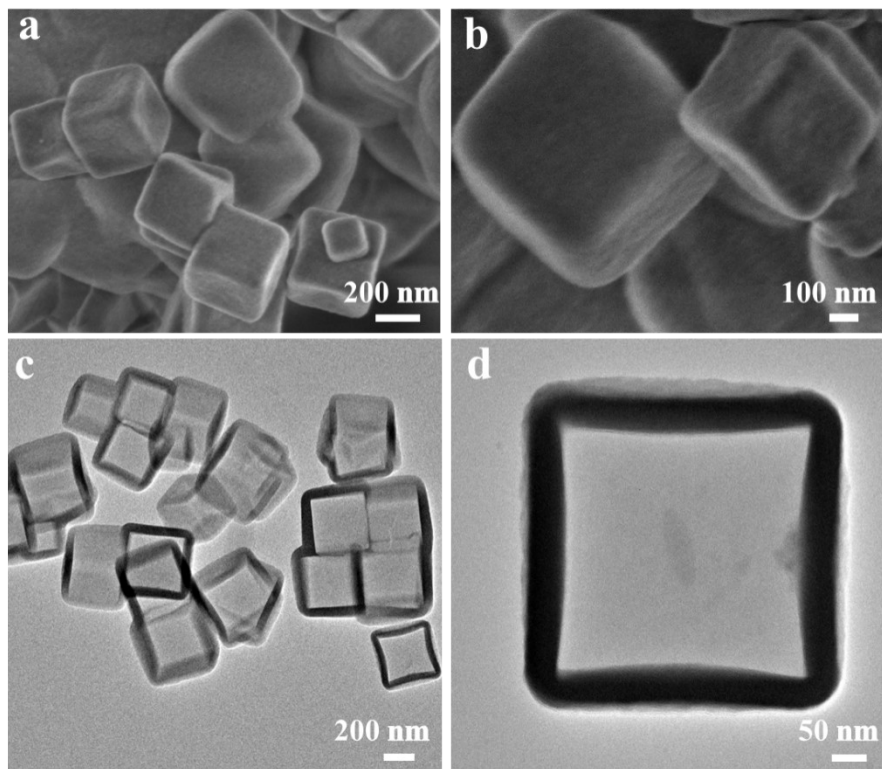

Fig S4. (a, b) SEM images and (c, d) TEM images of EZIF-67.

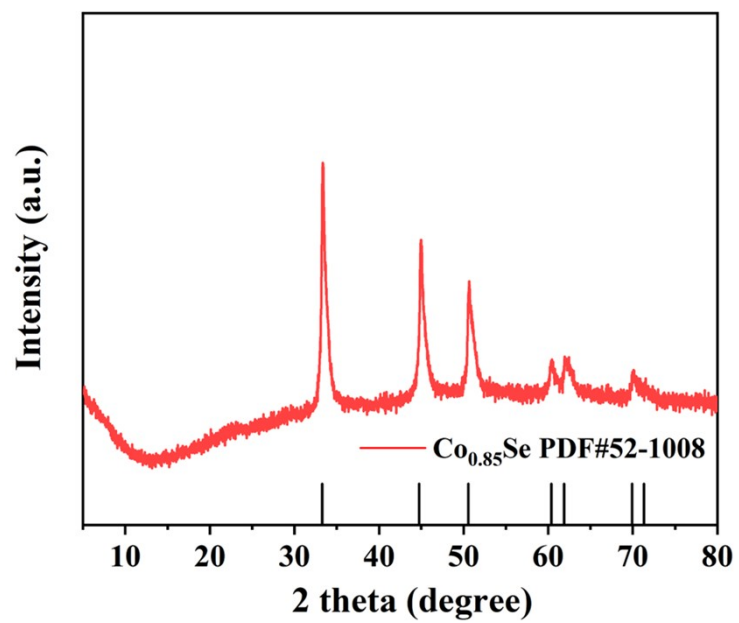

**Fig S5.** XRD pattern of  $\text{Co}_{0.85}\text{Se}@NC$ .

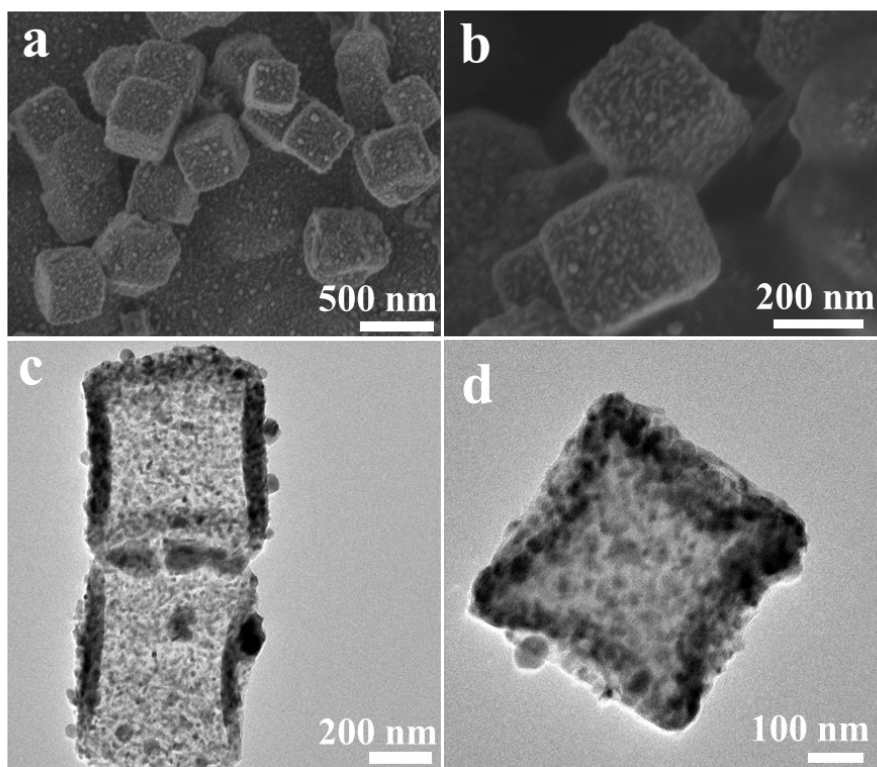

**Fig S6.** (a, b) SEM images and (c, d) TEM images of  $\text{Co}_{0.85}\text{Se}@NC$ .

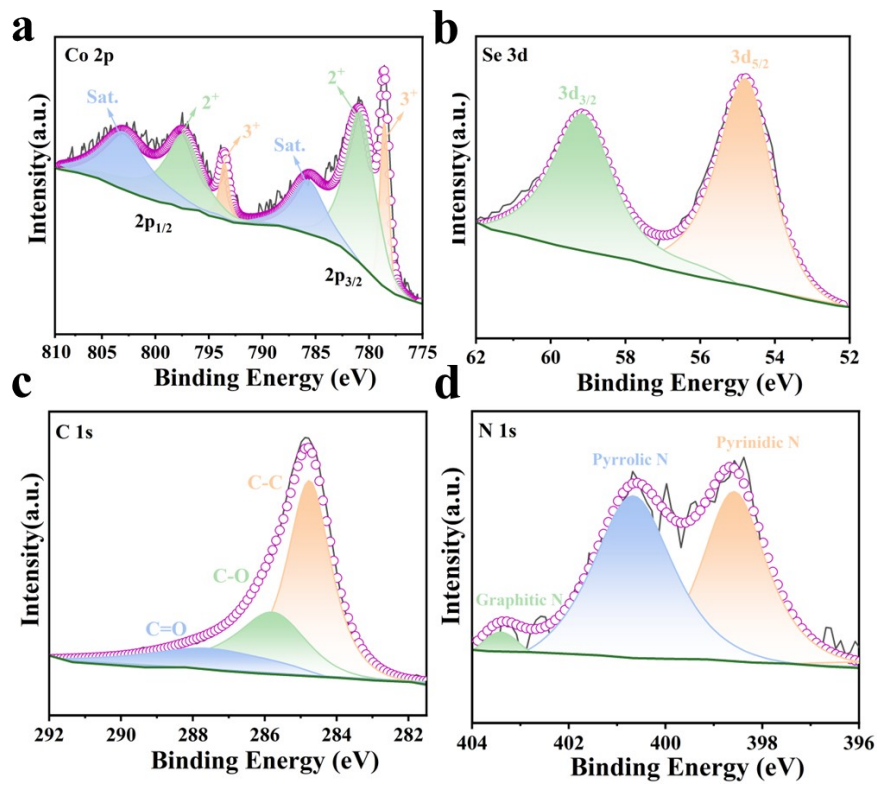

**Fig S7.** High-resolutions XPS spectra of (a) Co 2p, (b) Se 3d, (c) C 1s, and (d) N 1s of  $\text{Co}_{0.85}\text{Se}@NC$ .

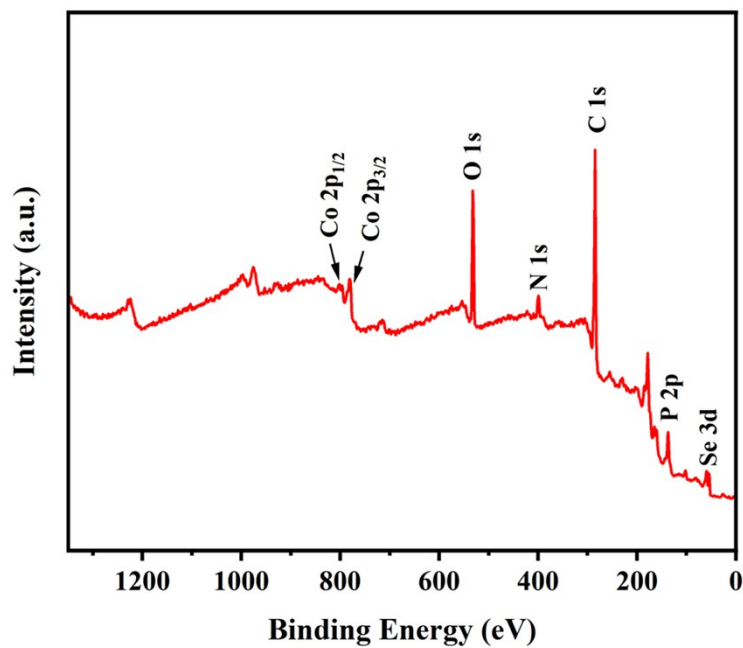

**Fig S8.** XPS survey spectrum of  $\text{P-Co}_{0.85}\text{Se}@PNC$ .

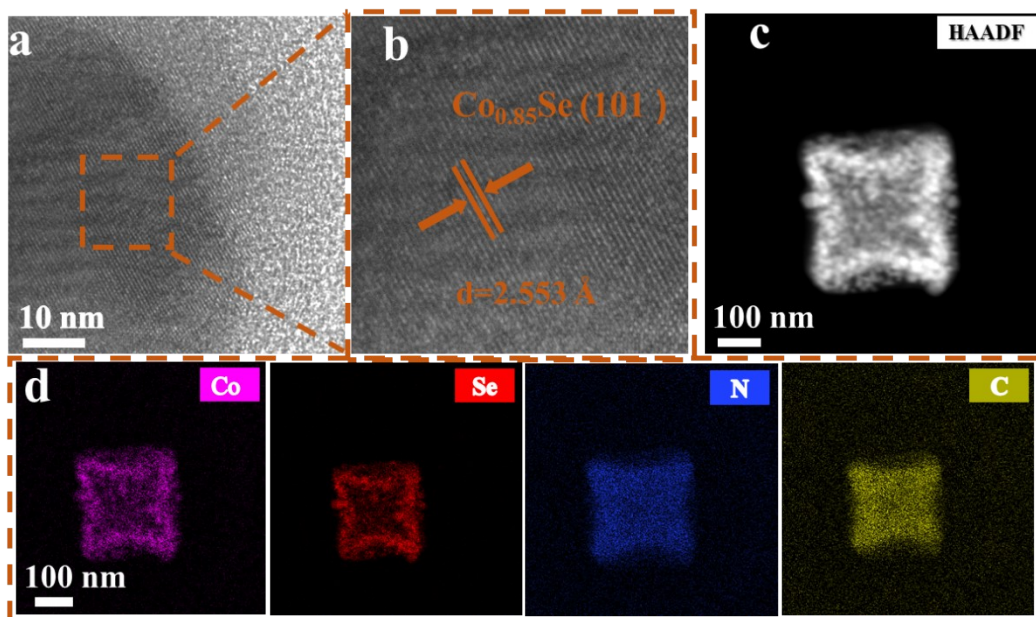

**Fig S9.** The morphology of  $\text{Co}_{0.85}\text{Se}@NC$ . (a, b) HRTEM image. (c, d) HAADF image and corresponding EDS elemental mapping images.

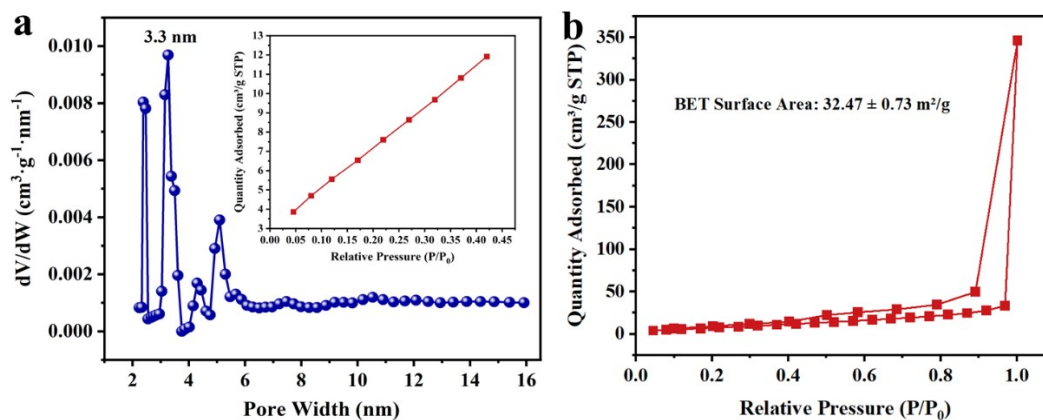

**Fig S10.** (a) Aperture distribution curve (insert: Corresponding specific surface area transfer curve) and (b)  $\text{N}_2$  adsorption-desorption isotherm of  $\text{P-Co}_{0.85}\text{Se}@PNC$ .

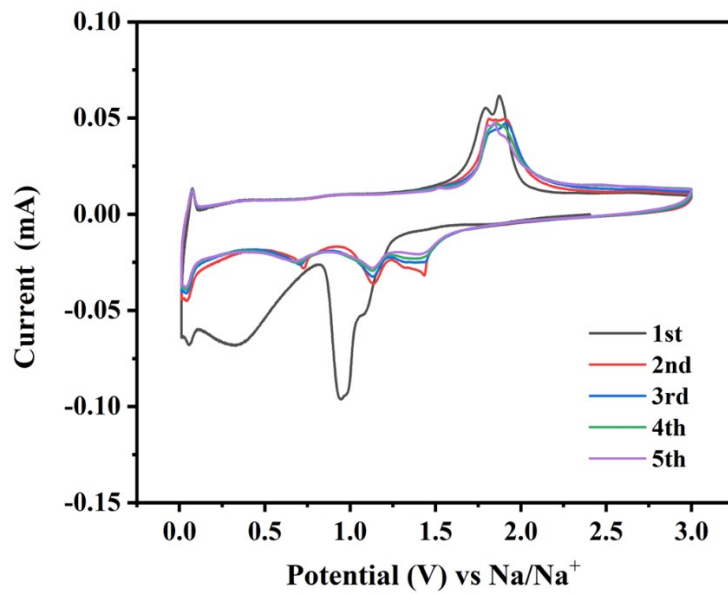

**Fig S11.** CV curves at a sweep rate of  $0.1 \text{ mV s}^{-1}$  in the range of 0.01-3.0 V of  $\text{Co}_{0.85}\text{Se@NC}$ .

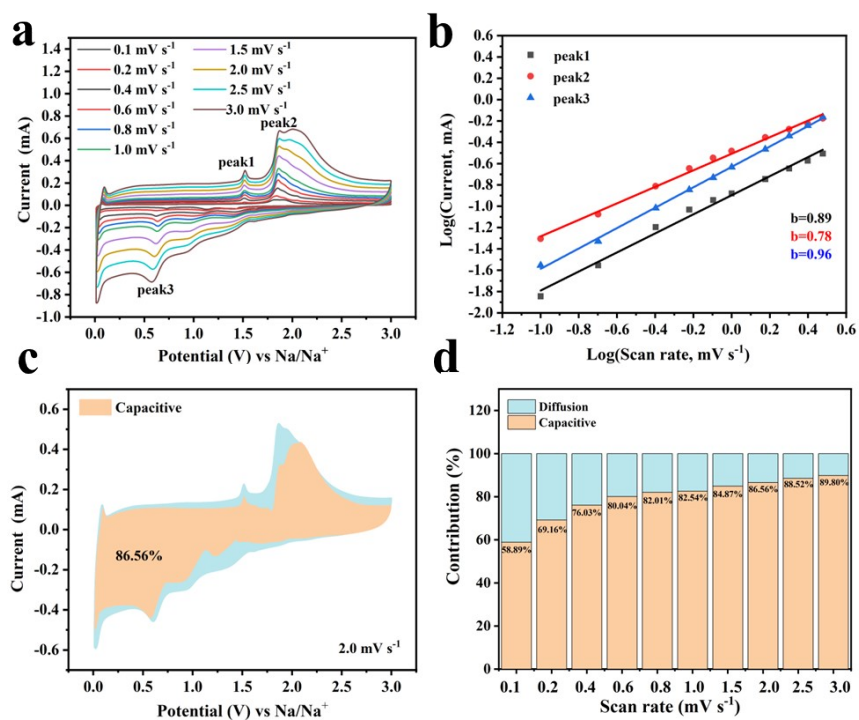

**Fig S12.** Kinetic analyses of Co<sub>0.85</sub>Se@NC electrode material. (a) CV curves at different scan sweeps from 0.1 mV s<sup>-1</sup> to 3.0 mV s<sup>-1</sup>. (b) The corresponding log *i* versus  $\nu$  plots. (c) The capacitive contribution in CV curves at 2.0 mV s<sup>-1</sup>. (d) Contribution of pseudocapacitive at various scan rates.



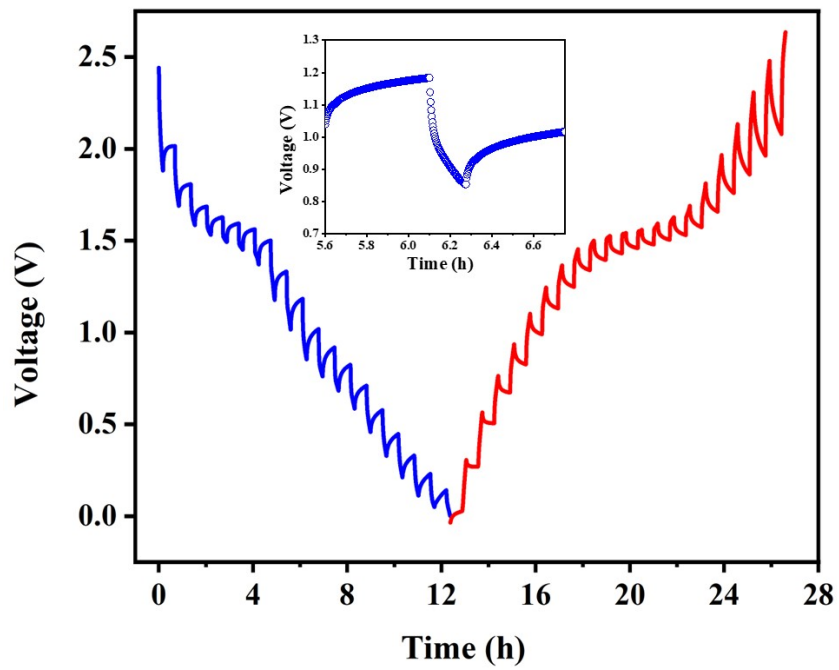

**Fig S13.** GITT curves (insert: local enlargement) of  $\text{Co}_{0.85}\text{Se}@NC$  electrode material.

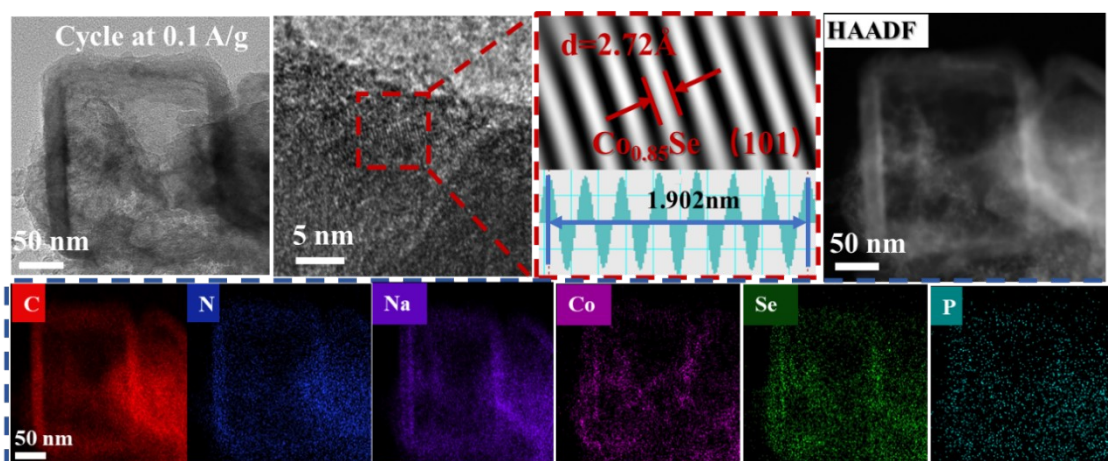

**Fig S14.** The morphology characterization of P-Co<sub>0.85</sub>Se@PNC electrode material cycles 100 times at the current density of 0.1 A g<sup>-1</sup>. (a) TEM image. (b and c) HRTEM images. (d and e) the corresponding EDS elemental mapping images.
